# Supplementary material for: Large energy-storage density in transition-metal oxide modified NaNbO3–Bi(Mg0.5Ti0.5)O3lead-free ceramics through regulating the antiferroelectric phase structure
Source: Royal Society of Chemistry journal article supplement (doi:10.1039/d0ta02285c), 2020-01-01
Supplement: d0ta02285c1.pdf [file d0ta02285c1.pdf]

## Supplementary Information

### **Giant energy-storage density in transition-metal oxide modified NaNbO<sub>3</sub>-Bi(Mg<sub>0.5</sub>Ti<sub>0.5</sub>)O<sub>3</sub> lead-free ceramics through regulating antiferroelectric phase structure**

Ao Tian, Ruzhong Zuo\*, He Qi, Min Shi

Institute of Electro Ceramics & Devices, School of Materials Science and Engineering,  
Hefei University of Technology, Hefei, 230009, P.R. China

\*Correspondence to: [piezolab@hfut.edu.cn](mailto:piezolab@hfut.edu.cn) (R.Z. Zuo)

**Table S1.** Refined structural parameters by using the Rietveld method for (1-x)NN-xBMT ceramics.

| x    | Space group | Fraction (%) | Lattice parameters                                         | V (Å <sup>3</sup> ) | R <sub>wp</sub> (%) | R <sub>p</sub> (%) | χ <sup>2</sup> |
|------|-------------|--------------|------------------------------------------------------------|---------------------|---------------------|--------------------|----------------|
| 0.05 | Pbma        | 100          | a=5.5573(8) Å, b=15.6161(1) Å,<br>c=5.5085(9) Å, α=β=γ=90° | 478.06(2)           | 11.40               | 9.40               | 1.21           |
| 0.06 | Pbma        | 43           | a=5.5644(9) Å, b=15.6251(6) Å,<br>c=5.5163(5) Å, α=β=γ=90° | 479.61(0)           | 10.42               | 8.16               | 1.66           |
|      | Pnma        | 57           | a=7.8263(4) Å, b=7.8295(1) Å,<br>c=23.4587(0) Å, α=β=γ=90° | 1437.38(8)          |                     |                    |                |
| 0.07 | Pnma        | 100          | a=7.8238(2) Å, b=7.8256(4) Å,<br>c=23.4598(6) Å, α=β=γ=90° | 1,436.34(8)         | 9.43                | 7.36               | 1.87           |
| 0.08 | Pnma        | 100          | a=7.8287(7) Å, b=7.8251(1) Å,<br>c=23.4618(0) Å, α=β=γ=90° | 1437.30(5)          | 9.63                | 7.42               | 1.90           |

\*R<sub>wp</sub>, R<sub>p</sub> and χ<sup>2</sup> represent the reliability factor of weighted patterns, the reliability factor of patterns and the goodness-of-fit indicator, respectively.

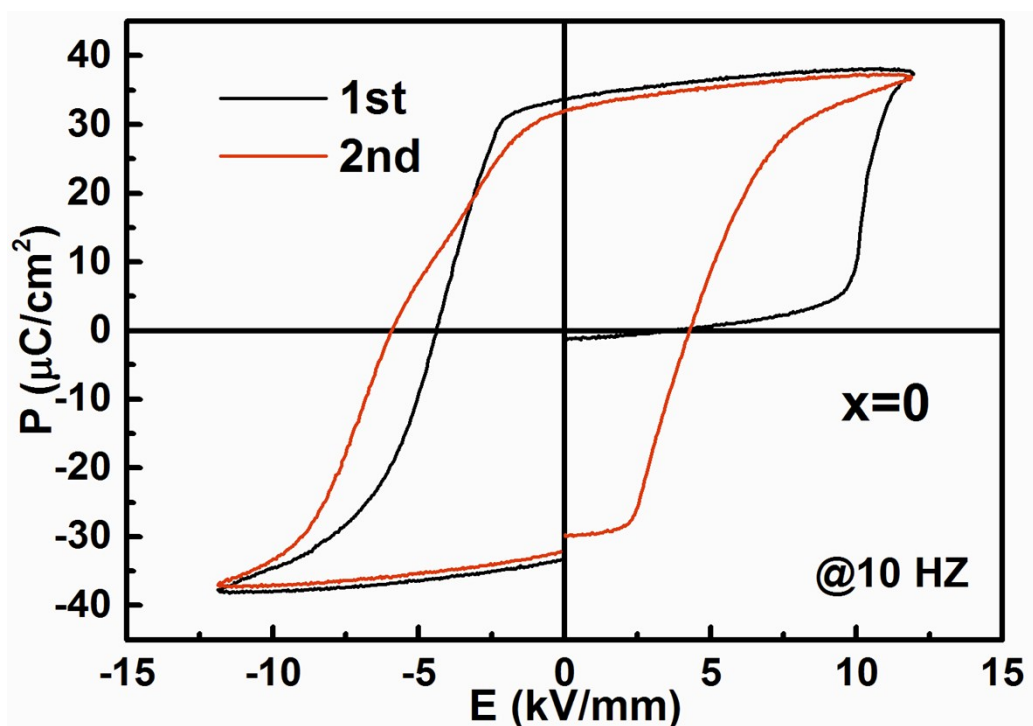

**Fig. S1.** P-E loops of the x=0 sample measured during the first and second electric cycles at 10 Hz

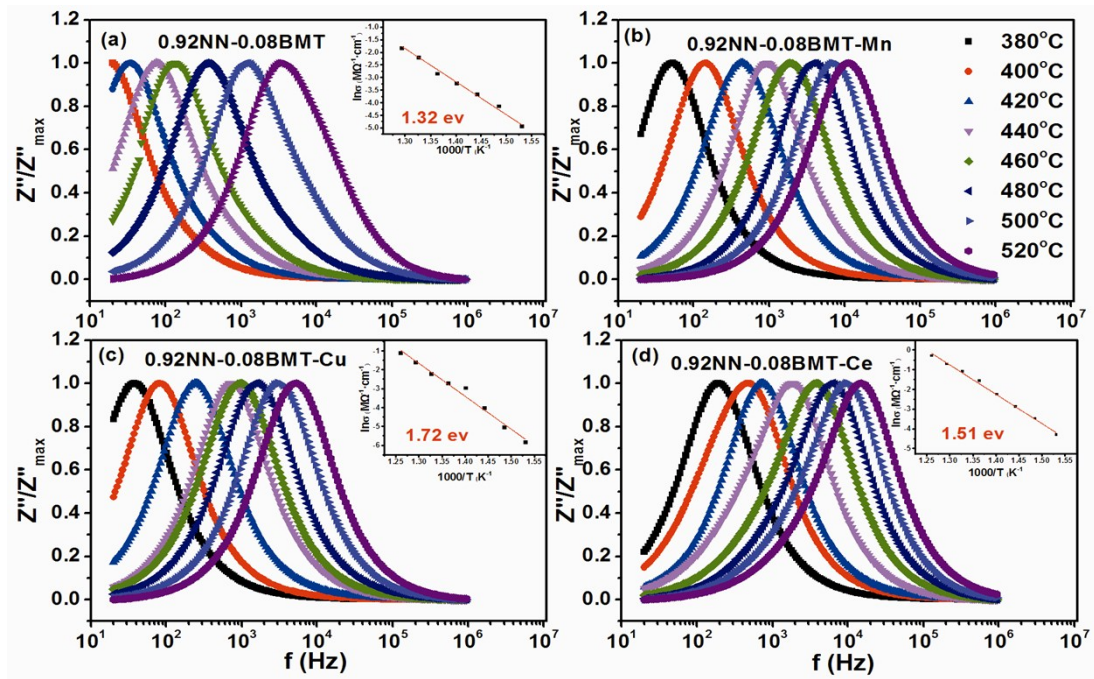

**Fig. S2.** Normalized imaginary parts  $Z''/Z''_{\max}$  of the impedance as a function of frequency for the (a) 0.92NN-0.08BMT and (b-d) oxides doped 0.92NN-0.08BMT samples in the temperature range of 380 °C-520 °C.

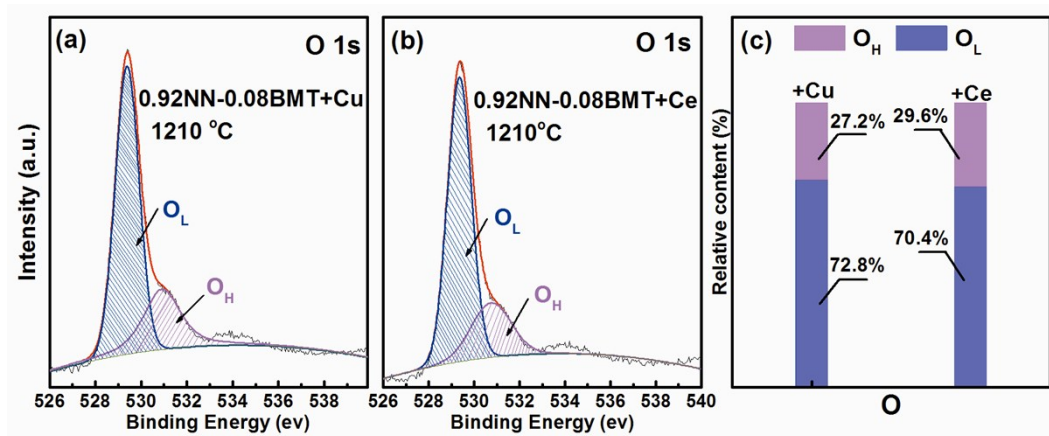

**Fig. S3.** XPS data of the O 1S for (a) 0.92NN-0.08BMT-Cu, (b) 0.92NN-0.08BMT-Ce samples, and (c) the relative content of  $O_L$ ,  $O_H$  for 0.92NN-0.08BMT-Cu and 0.92NN-0.08BMT-Ce samples.
